# Supplementary material for: Progression of regional grey matter atrophy in multiple sclerosis
Source: PubMed Central journal article supplement (PMC5995197; doi:10.1093/brain/awy088), 2018-05-08
Supplement: awy088_brain-2017-01792-file005.pdf [file awy088_brain-2017-01792-file005.pdf]

## **Supplementary Methods**

### **Effects of comorbidities on atrophy measures**

We performed a subgroup analysis on the subset of patients with available comorbidity information. The comorbidity was defined as a categorical variable that showed the documented presence (or absence) of diabetes, hypertension, hyperlipidaemia, ischemic heart disease, stroke, other autoimmune diseases, psychiatric diagnosis (major depression disorder, bipolar disorder, alcohol abuse, and other psychiatric disorder), chronic lung disease, renal disorders, migraine, and smoking before the date of first scan (Ann Marrie et al. 2015 and Geraldes et al. 2017). We aimed to compare the effect of comorbidities on the rate of change in the event-based model stage. We used a linear mixed effects model in which the event-based model stage was the outcome variable. Time, comorbidity, and the interaction of comorbidity with time were the fixed-effect variables. Time was nested in the centre as the random-effect.

### **Supplementary Results**

The data on comorbidities were available for 28% of patients (n=340) at baseline. Out of these patients, 183 patients (18 primary-progressive multiple sclerosis, 110 relapsing-remitting multiple sclerosis, 22 secondary-progressive multiple sclerosis, and 33 clinically isolated syndrome), had at least one comorbidity and the remaining 157 (23 primary progressive multiple sclerosis, 86 relapsing-remitting multiple sclerosis, 8 secondary-progressive multiple sclerosis, and 40 with the clinically isolated syndrome) had no comorbidity. At baseline, patients without comorbidity were significantly younger than those with comorbidity ( $37.27 \pm 9.79$  vs  $40.2 \pm 11.56$ ,  $p=0.01$ ). The number of atrophic brain regions (or the event-based model stage) did not differ between patients with and without comorbidity (11.03 (9.41) vs 9.08 (9.01),  $p=0.18$ ). Similarly, the estimated annual rate of change ( $\pm$ standard error) in the event-based model stage did not differ between the two groups ( $0.575 (\pm 0.22)$  vs  $0.76 (\pm 0.32)$ ,  $p=0.55$ , adjusted for age).

**Supplementary Table 1. MRI protocols for each participating centre.**

|                  | T1-weighted MRI |                        |                     |         |         |             |        | Sequence for lesion delineation |           |          |         |             |                 |
|------------------|-----------------|------------------------|---------------------|---------|---------|-------------|--------|---------------------------------|-----------|----------|---------|-------------|-----------------|
|                  | Magnetic field  | Vendor                 | Voxel dimension     | TR      | TE      | Matrix size | Slices | MR Sequence                     | TE        | TR       | TI      | Matrix size | Slice thickness |
| <b>London</b>    | 1.5T            | General Electric Signa | 3D (1.2x1.2x1.5 mm) | 13.3 ms | 4.2 ms  | 256x256     | 124    | T2                              | 80 ms     | 1720 ms  | –       | 256x256     | 5 mm            |
|                  | 1.5T            | General Electric Signa | 3D (1.2x1.2x1.2)    | 14.3 ms | 5.1 ms  | 256x256     | 156    | PD-T2                           | 17-102 ms | 2000 ms  |         | 256x256     | 5 mm            |
|                  | 1.5T            | General Electric Signa | 3D (1.2x1.2x1.5)    | 29 ms   | 15 ms   | 256x256     | 124    | PD-T2                           | 17-102 ms | 2000 ms  | –       | 256x 256    | 5 mm            |
|                  | 3T              | Philips Achieva        | 3D (1x1x1 mm)       | 6.8 ms  | 3.1 ms  | 256x256     | 256    | PD-T2                           | 19-85 ms  | 3500 ms  | –       | 240x240     | 3 mm            |
| <b>Milan</b>     | 1.5T            | Siemens Avanto         | 3D (1x1x1 mm)       | 2000 ms | 3.93 ms | 256*224     | 208    | PD-T2                           | 28-113 ms | 2560 ms  | –       | 256x256     | 2.5 mm          |
|                  | 3T              | Philips Intera         | 3D (0.89x0.89x1 mm) | 25 ms   | 4.6 ms  | 256*256     | 220    | PD-T2                           | 24-120 ms | 3350 ms  | –       | 256x256     | 3 mm            |
| <b>Graz</b>      | 3T              | Siemens Tim Trio       | 3D (1x1x1 mm)       | 1900 ms | 2.6 ms  | 176*221     | 256    | FLAIR                           | 69 ms     | 10000 ms | 2500 ms | 192x256     | 3 mm            |
| <b>Barcelona</b> | 1.5T            | Siemens Symphony       | 3D (1x1x1 mm)       | 1980 ms | 3.1 ms  | 256x256     | 176    | FLAIR                           | 95 ms     | 8500 ms  | 2440 ms | 192x256     | 3 mm            |
|                  | 3T              | Siemens Tim Trio       | 3D (1x1x1.2 mm)     | 2300 ms | 2.98 ms | 256x240     | 128    | FLAIR                           | 93 ms     | 9000 ms  | 2500 ms | 400x512     | 3 mm            |
| <b>Amsterdam</b> | 1.5T            | Siemens Vision         | 3D (1x1x1 mm)       | 4000 ms | 20 ms   | 180x256     | 256    | T2                              | 20 ms     | 4000 ms  | 108 ms  | 256x256     | 3 mm            |
| <b>Rome</b>      | 1.5T            | Siemens Avanto         | 3D (1x1x1 mm)       | 9000 ms | 89 ms   | 192x256     | 160    | FLAIR                           | 89 ms     | 9000 ms  | 2500 ms | 192x256     | 3 mm            |
| <b>Siena</b>     | 1.5T            | Philips Gyroscan       | 2D (0.97x0.97x3mm ) | 35 ms   | 10 ms   | 256x256     | 50     | FLAIR                           | 150 ms    | 9000 ms  | 2725 ms | 256x256     | 3mm             |
| <b>PPMI</b>      | 3T              | Siemens Tim Trio       | 3D (1x1x1mm)        | 2300 ms | 2.52 ms | 176x240     | 256    | –                               | –         | –        | –       | –           | –               |

FLAIR, Fluid Attenuated Inversion Recovery.

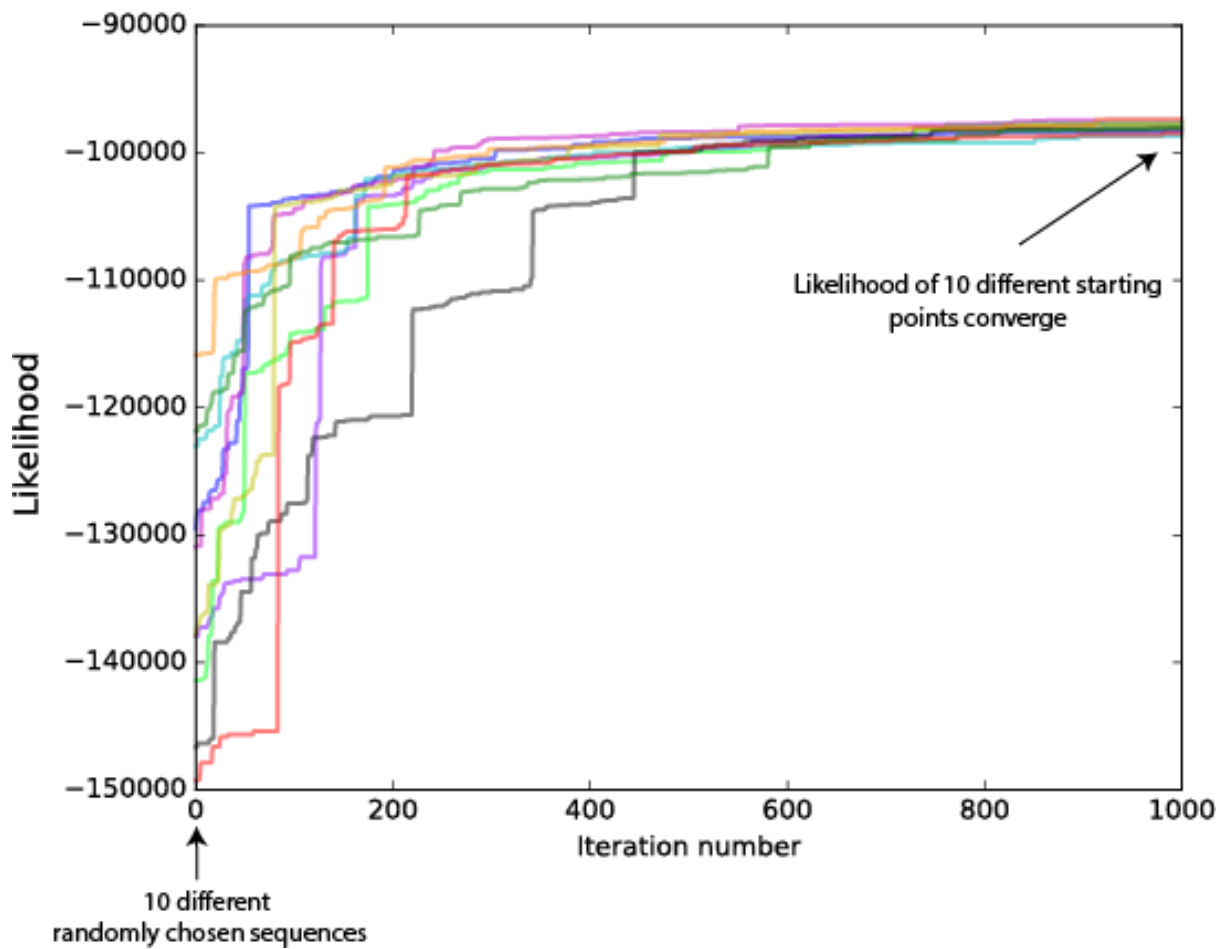

Supplementary Figure 1: Greedy ascent search and convergence of likelihoods. The most likely sequence of atrophy progression in relation to 10 randomly chosen initial sequences. The y-axis shows the data likelihood (calculated from Equation 1). The x-axis shows the number of iterations at which two events are randomly swapped in search for a higher sequence likelihood. This procedure was repeated during each cross-validation (10 times).

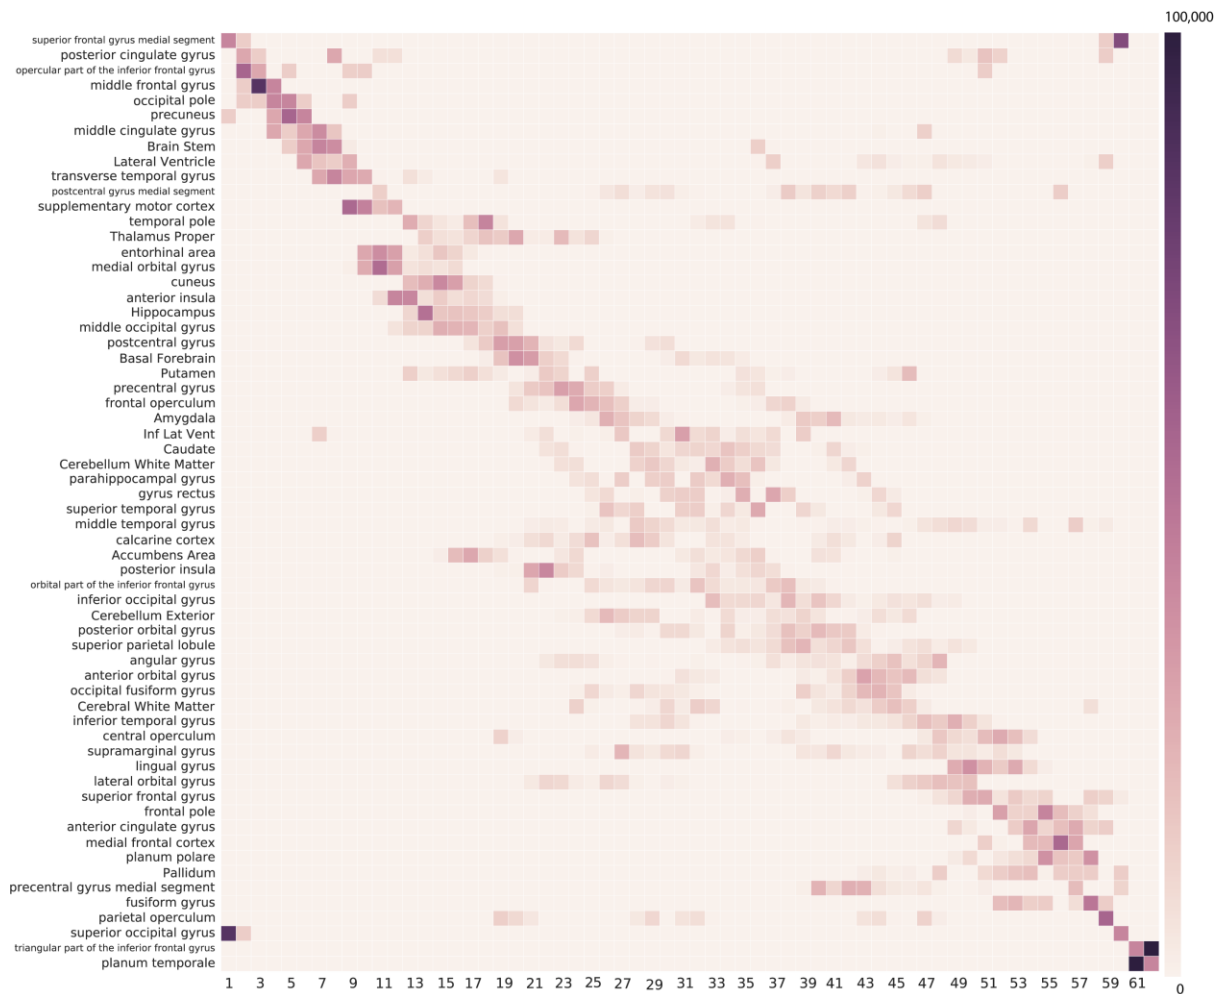

Supplementary Figure 2: Event-based model applied to all regions in patients with CIS/relapse-onset MS

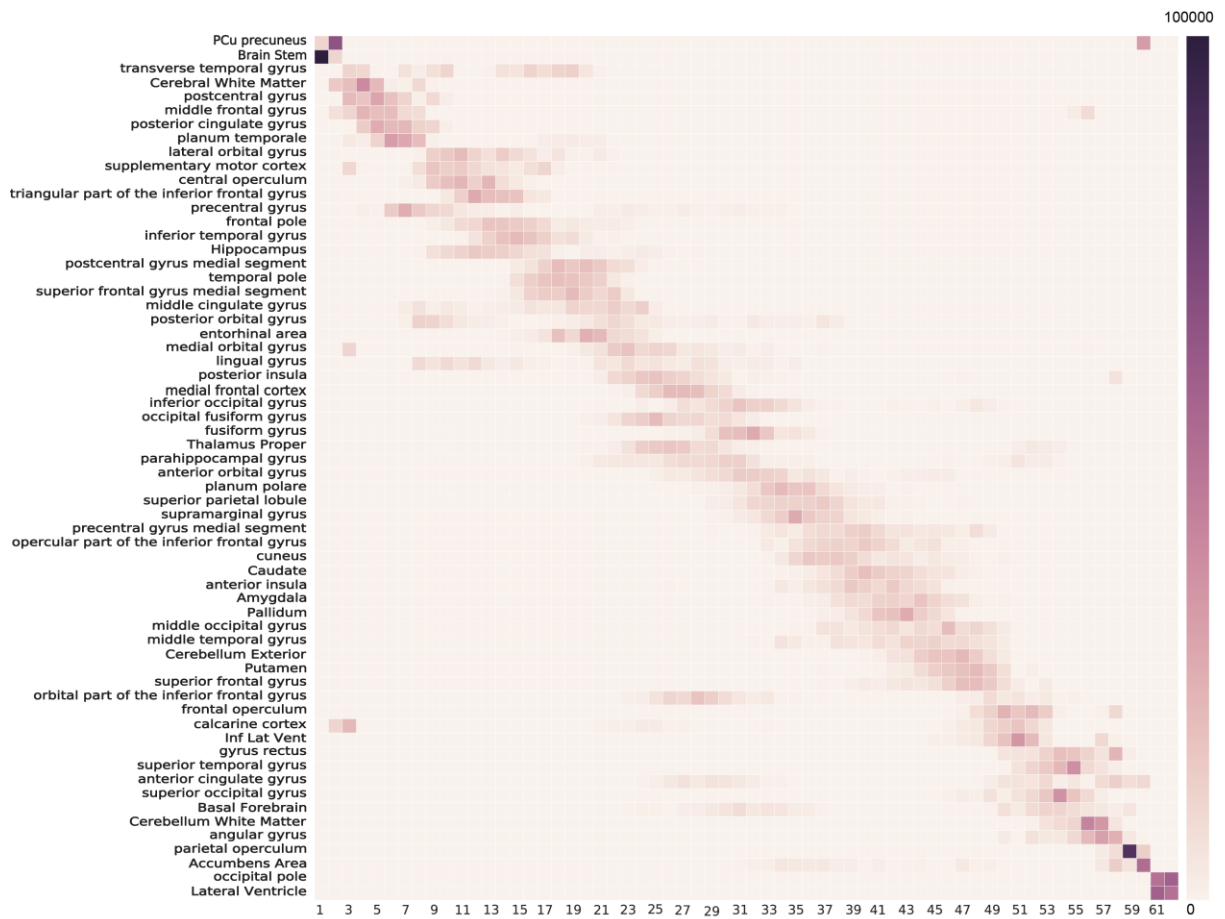

Supplementary Figure 3: Event-based model applied to all regions in patients with PPMS.
